# Supplementary material for: The coordinated expression, interaction and evolution of the neuroendocrine genes
Source: Royal Society of Chemistry journal article supplement (doi:10.1039/c2ib20081c), 2012-01-01
Supplement: c2ib20081c.pdf [file c2ib20081c.pdf]

## **Electronic supplementary information (ESI)**

**The coordinated expression, interaction and evolution of the neuroendocrine genes.**

**Basant K. Tiwary**

**Centre for Bioinformatics**

**Pondicherry University**

**Pondicherry- 605 014**

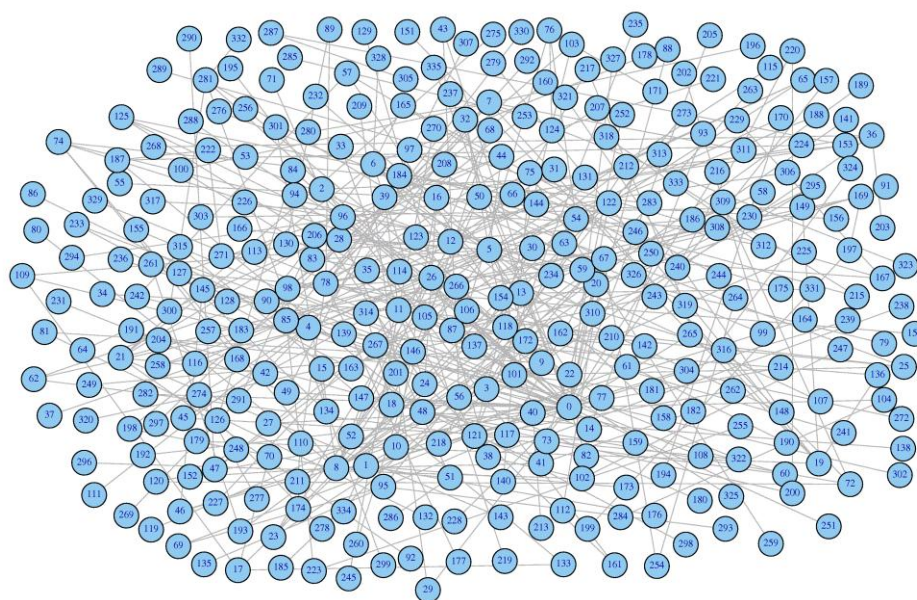

**Fig. S1: The Barabasi-Albert (BA) network generated randomly for comparison with the real network.**

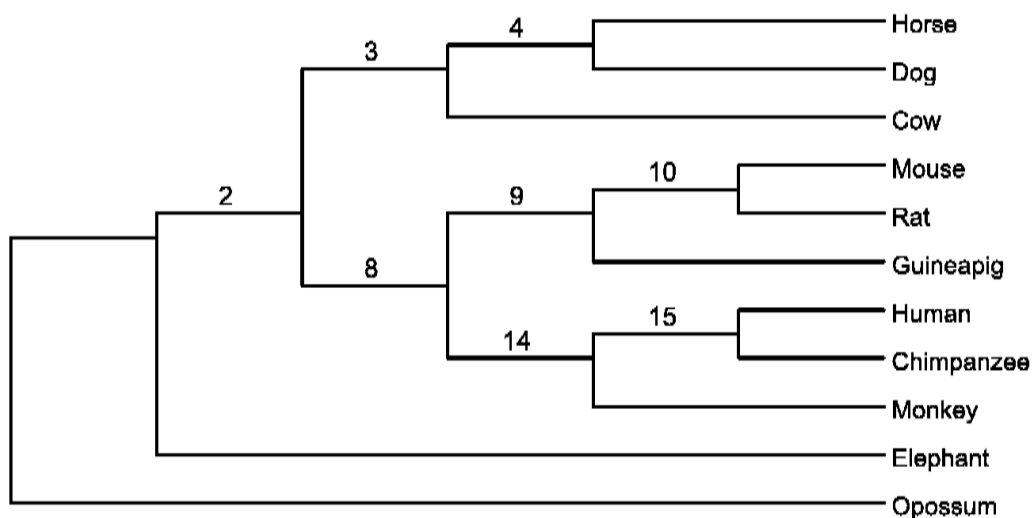

**Fig. S2: The phylogenetic tree showing relationship among species used for evolutionary studies.** Numbers indicate the number of respective internal node.

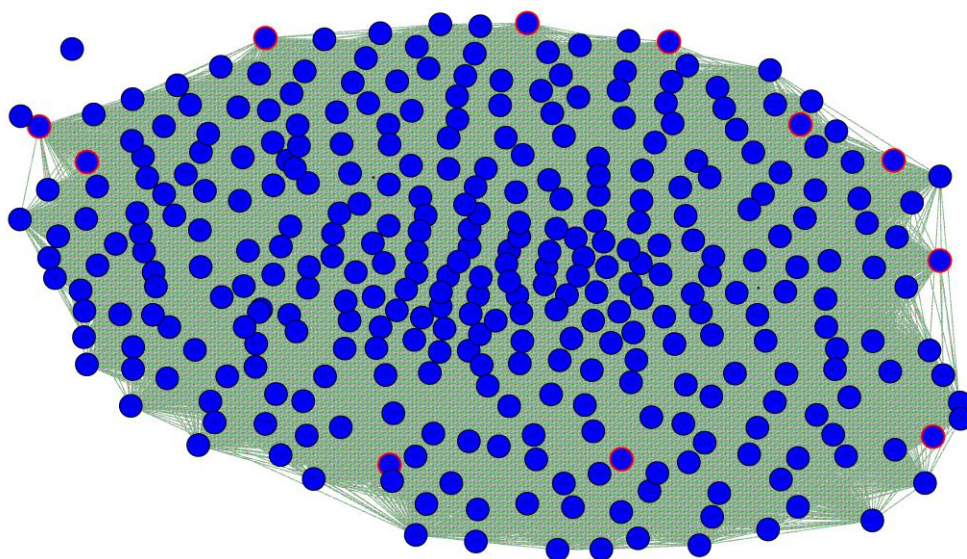

**Fig. S3: Gene coexpression network of the neuroendocrine genes.** Neuroendocrine genes are circled in red color.

**Table S1: Spearman rank correlation between neuroendocrine genes.**

| <b>Gene pair</b>  | <b>Spearman correlation coefficient (<math>\rho</math>)</b> | <b>P- value</b>        |
|-------------------|-------------------------------------------------------------|------------------------|
| <i>GnRH-GnIH</i>  | 0.49                                                        | $4.36 \times 10^{-11}$ |
| <i>PDYN-TAC3</i>  | 0.72                                                        | $2.2 \times 10^{-16}$  |
| <i>GnRH-KISS1</i> | 0.40                                                        | $1.58 \times 10^{-7}$  |
| <i>GnRH-PDYN</i>  | 0.38                                                        | $7.17 \times 10^{-7}$  |
| <i>GnIH-PDYN</i>  | 0.42                                                        | $3.72 \times 10^{-8}$  |
| <i>GnRH-TAC3</i>  | 0.36                                                        | $4.01 \times 10^{-6}$  |
| <i>GnIH-TAC3</i>  | 0.52                                                        | $3.52 \times 10^{-12}$ |
| <i>GnIH-KISS1</i> | 0.49                                                        | $5.70 \times 10^{-11}$ |
| <i>PDYN-KISS1</i> | 0.58                                                        | $8.92 \times 10^{-16}$ |
| <i>TAC3-KISS1</i> | 0.78                                                        | $2.20 \times 10^{-16}$ |
| <i>GHRH-SST</i>   | 0.54                                                        | $2.70 \times 10^{-13}$ |
| <i>GHRH-GnRH</i>  | 0.38                                                        | $7.16 \times 10^{-7}$  |
| <i>GHRH-GnIH</i>  | 0.35                                                        | $6.20 \times 10^{-6}$  |
| <i>SST-GnRH</i>   | 0.33                                                        | $2.44 \times 10^{-5}$  |
| <i>SST-GnIH</i>   | 0.36                                                        | $3.55 \times 10^{-6}$  |
| <i>GHRH-TAC3</i>  | 0.64                                                        | $2.20 \times 10^{-16}$ |
| <i>GHRH-PDYN</i>  | 0.51                                                        | $5.86 \times 10^{-16}$ |
| <i>SST-INS</i>    | 0.74                                                        | $2.20 \times 10^{-16}$ |
| <i>SST-TAC3</i>   | 0.78                                                        | $2.20 \times 10^{-16}$ |
| <i>SST-PDYN</i>   | 0.71                                                        | $2.20 \times 10^{-16}$ |
| <i>CALCA-PTH</i>  | 0.44                                                        | $8.34 \times 10^{-9}$  |
| <i>INS-GCG</i>    | 0.77                                                        | $2.20 \times 10^{-16}$ |
| <i>CALCA-INS</i>  | 0.74                                                        | $2.20 \times 10^{-16}$ |
| <i>CALCA-GCG</i>  | 0.61                                                        | $2.20 \times 10^{-16}$ |

|                |      |                       |
|----------------|------|-----------------------|
| <i>PTH-INS</i> | 0.43 | $1.30 \times 10^{-8}$ |
| <i>PTH-GCG</i> | 0.43 | $1.56 \times 10^{-8}$ |

---

**Table S2: Genomic locations of neuroendocrine genes in human**

| <b>Gene</b>                                          | <b>Accession number</b> | <b>Genomic location</b> | <b>Strand</b> |
|------------------------------------------------------|-------------------------|-------------------------|---------------|
| Gonadotropin- releasing hormone ( <i>GNRH1</i> )     | ENSG00000147437         | 8: 25276776-25282170    | Reverse       |
| Gonadotropin- releasing hormone ( <i>GNIH/NPVF</i> ) | ENSG00000105954         | 7: 25264189-25268105    | Reverse       |
| Kisspeptin ( <i>KISS1</i> )                          | ENSG00000170498         | 1: 204159469-204165614  | Reverse       |
| Tachykinin3 ( <i>TAC3</i> )                          | ENSG00000166863         | 12: 57403784-57422667   | Reverse       |
| Prodynorphin ( <i>PDYN</i> )                         | ENSG00000101327         | 20: 1959403-1974732     | Reverse       |
| Growth hormone releasing hormone ( <i>GHRH</i> )     | ENSG00000118702         | 20: 35879489-35890238   | Reverse       |
| Somatostatin ( <i>SST</i> )                          | ENSG00000157005         | 3: 187386694-187388187  | Reverse       |
| Parathormone ( <i>PTH</i> )                          | ENSG00000152266         | 11: 13513602-13517728   | Reverse       |
| Calcitonin ( <i>CALCA</i> )                          | ENSG00000110680         | 11: 14988214-14993900   | Reverse       |
| Insulin ( <i>INS</i> )                               | ENSG00000254647         | 11: 2181009-2182571     | Reverse       |
| Glucagon ( <i>GCG</i> )                              | ENSG00000115263         | 2: 162999392-163008914  | Reverse       |

**Table S3: A comparative account of the degree between neuroendocrine genes.** The degree of nodes in a randomly generated scale-free Barabasi-Albert (BA) network is given for comparison. Numbers in parentheses indicate the number of node for the gene in the neuroendocrine network.

| Gene pair               | Degree of nodes in real network |        | Difference | Degree of nodes in BA network |        | Difference |
|-------------------------|---------------------------------|--------|------------|-------------------------------|--------|------------|
|                         | Node1                           | Node 2 |            | Node 1                        | Node 2 |            |
| <i>GnRH(0)-GnIH(1)</i>  | 173                             | 161    | 1.07       | 38                            | 7      | 5.43       |
| <i>PDYN(3)-TAC3(4)</i>  | 201                             | 190    | 1.06       | 2                             | 4      | 2.00       |
| <i>GnRH(0)-KISS1(5)</i> | 173                             | 176    | 1.02       | 38                            | 11     | 3.45       |
| <i>GnRH(0)-PDYN(3)</i>  | 173                             | 201    | 1.16       | 38                            | 2      | 19.00      |
| <i>GnIH(1)-PDYN(3)</i>  | 161                             | 201    | 1.24       | 7                             | 2      | 3.50       |
| <i>GnRH(0)-TAC3(4)</i>  | 173                             | 190    | 1.09       | 38                            | 4      | 9.50       |
| <i>GnIH(1)-TAC3(4)</i>  | 161                             | 190    | 1.18       | 7                             | 4      | 1.75       |
| <i>GnIH(1)-KISS1(5)</i> | 161                             | 176    | 1.09       | 7                             | 11     | 1.57       |
| <i>PDYN(3)-KISS1(5)</i> | 201                             | 176    | 1.14       | 2                             | 11     | 5.50       |
| <i>TAC3(3)-KISS1(5)</i> | 190                             | 176    | 1.08       | 4                             | 11     | 2.75       |
| <i>GHRH(6)-SST(7)</i>   | 190                             | 170    | 1.12       | 22                            | 10     | 2.20       |
| <i>GHRH(6)-GnRH(0)</i>  | 190                             | 173    | 1.10       | 22                            | 38     | 1.73       |
| <i>GHRH(6)-GnIH(1)</i>  | 190                             | 161    | 1.18       | 22                            | 7      | 3.14       |
| <i>SST(7)-GnRH(0)</i>   | 170                             | 173    | 1.02       | 10                            | 38     | 3.80       |
| <i>SST(7)-GnIH(1)</i>   | 170                             | 161    | 1.05       | 10                            | 7      | 1.43       |
| <i>GHRH(6)-TAC3(4)</i>  | 190                             | 190    | 1.00       | 22                            | 4      | 5.50       |
| <i>GHRH(6)-PDYN(3)</i>  | 190                             | 201    | 1.06       | 22                            | 2      | 11         |
| <i>SST(7)-INS(10)</i>   | 170                             | 189    | 1.11       | 10                            | 7      | 1.43       |
| <i>SST(7)-TAC3(4)</i>   | 170                             | 190    | 1.12       | 10                            | 4      | 2.5        |
| <i>SST(7)-PDYN(3)</i>   | 170                             | 201    | 1.18       | 10                            | 2      | 5          |

|                         |     |     |      |    |    |      |
|-------------------------|-----|-----|------|----|----|------|
| <i>CALCA(8)-PTH(9)</i>  | 180 | 174 | 1.03 | 6  | 16 | 2.66 |
| <i>INS(10)-GCG(11)</i>  | 189 | 188 | 1.01 | 7  | 2  | 3.50 |
| <i>CALCA(8)-INS(10)</i> | 180 | 189 | 1.05 | 6  | 7  | 1.17 |
| <i>CALCA(8)-GCG(11)</i> | 180 | 188 | 1.04 | 6  | 2  | 3.00 |
| <i>PTH(9)-INS(10)</i>   | 174 | 189 | 1.09 | 16 | 7  | 2.29 |
| <i>PTH(9)-GCG(11)</i>   | 174 | 188 | 1.08 | 16 | 2  | 8.00 |

---

**Table S4: A comparison of clustering coefficients between the neuroendocrine genes.**

| <b>Gene pair</b>  | <b>Clustering Coefficient of gene1</b> | <b>Clustering Coefficient of gene 2</b> | <b>Difference</b> |
|-------------------|----------------------------------------|-----------------------------------------|-------------------|
| <i>GnRH-GnIH</i>  | 0.85                                   | 0.87                                    | 1.02              |
| <i>PDYN-TAC3</i>  | 0.87                                   | 0.87                                    | 1.00              |
| <i>GnRH-KISS1</i> | 0.85                                   | 0.91                                    | 1.07              |
| <i>GnRH-PDYN</i>  | 0.85                                   | 0.87                                    | 1.02              |
| <i>GnIH-PDYN</i>  | 0.87                                   | 0.87                                    | 1.00              |
| <i>GnRH-TAC3</i>  | 0.85                                   | 0.87                                    | 1.02              |
| <i>GnIH-TAC3</i>  | 0.87                                   | 0.87                                    | 1.00              |
| <i>GnIH-KISS1</i> | 0.87                                   | 0.91                                    | 1.04              |
| <i>PDYN-KISS1</i> | 0.87                                   | 0.91                                    | 1.04              |
| <i>TAC3-KISS1</i> | 0.87                                   | 0.91                                    | 1.04              |
| <i>GHRH-SST</i>   | 0.87                                   | 0.89                                    | 1.02              |
| <i>GHRH-GnRH</i>  | 0.87                                   | 0.85                                    | 1.02              |
| <i>GHRH-GnIH</i>  | 0.87                                   | 0.87                                    | 1.00              |
| <i>SST-GnRH</i>   | 0.89                                   | 0.85                                    | 1.05              |
| <i>SST-GnIH</i>   | 0.89                                   | 0.87                                    | 1.02              |
| <i>GHRH-TAC3</i>  | 0.87                                   | 0.87                                    | 1.00              |
| <i>GHRH-PDYN</i>  | 0.87                                   | 0.87                                    | 1.00              |
| <i>SST-INS</i>    | 0.89                                   | 0.87                                    | 1.02              |
| <i>SST-TAC3</i>   | 0.89                                   | 0.87                                    | 1.02              |
| <i>SST-PDYN</i>   | 0.89                                   | 0.87                                    | 1.02              |
| <i>CALCA-PTH</i>  | 0.89                                   | 0.85                                    | 1.04              |
| <i>INS-GCG</i>    | 0.87                                   | 0.88                                    | 1.01              |
| <i>CALCA-INS</i>  | 0.89                                   | 0.87                                    | 1.02              |
| <i>CALCA-GCG</i>  | 0.89                                   | 0.88                                    | 1.01              |



|                |      |      |      |
|----------------|------|------|------|
| <i>PTH-INS</i> | 0.85 | 0.87 | 1.02 |
| <i>PTH-GCG</i> | 0.85 | 0.88 | 1.04 |

---

**Table S5: A comparison of geodesic distance and Jaccard similarity index between the neuroendocrine genes.**

| <b>Gene pair</b>  | <b>Geodesic distance</b> | <b>Jaccard similarity</b> |
|-------------------|--------------------------|---------------------------|
| <i>GnRH-GnIH</i>  | 0.00140                  | 0.53                      |
| <i>PDYN-TAC3</i>  | 0.00229                  | 0.66                      |
| <i>GnRH-KISS1</i> | 0.00290                  | 0.49                      |
| <i>GnRH-PDYN</i>  | 0.00153                  | 0.41                      |
| <i>GnIH-PDYN</i>  | 0.00171                  | 0.38                      |
| <i>GnRH-TAC3</i>  | 0.00267                  | 0.35                      |
| <i>GnIH-TAC3</i>  | 0.00253                  | 0.32                      |
| <i>GnIH-KISS1</i> | 0.00274                  | 0.50                      |
| <i>PDYN-KISS1</i> | 0.00327                  | 0.50                      |
| <i>TAC3-KISS1</i> | 0.00347                  | 0.50                      |
| <i>GHRH-SST</i>   | 0.00089                  | 0.49                      |
| <i>CALCA-PTH</i>  | 0.00095                  | 0.59                      |
| <i>INS-GCG</i>    | 0.00133                  | 0.65                      |
| <i>CALCA-INS</i>  | 0.00088                  | 0.50                      |
| <i>CALCA-GCG</i>  | 0.00082                  | 0.57                      |
| <i>PTH-INS</i>    | 0.00136                  | 0.50                      |
| <i>PTH-GCG</i>    | 0.00089                  | 0.52                      |

**Table S6: A comparison of closeness and Burt's constraint between the neuroendocrine genes.**

| Gene pair         | Closeness (a measure of Centrality) of a node |        | Difference | Burt's constraint |        | Difference |
|-------------------|-----------------------------------------------|--------|------------|-------------------|--------|------------|
|                   | Node 1                                        | Node 2 |            | Node 1            | Node 2 |            |
|                   | <i>GnRH-GnIH</i>                              | 0.67   |            | 0.66              | 1.01   |            |
| <i>PDYN-TAC3</i>  | 0.72                                          | 0.70   | 1.02       | 0.023             | 0.025  | 1.08       |
| <i>GnRH-KISS1</i> | 0.67                                          | 0.68   | 1.01       | 0.024             | 0.026  | 1.08       |
| <i>GnRH-PDYN</i>  | 0.67                                          | 0.72   | 1.07       | 0.024             | 0.023  | 1.04       |
| <i>GnIH-PDYN</i>  | 0.66                                          | 0.72   | 1.09       | 0.027             | 0.023  | 1.17       |
| <i>GnRH-TAC3</i>  | 0.67                                          | 0.70   | 1.04       | 0.024             | 0.025  | 1.04       |
| <i>GnIH-TAC3</i>  | 0.66                                          | 0.70   | 1.06       | 0.027             | 0.025  | 1.08       |
| <i>GnIH-KISS1</i> | 0.66                                          | 0.68   | 1.03       | 0.027             | 0.026  | 1.03       |
| <i>PDYN-KISS1</i> | 0.72                                          | 0.68   | 1.05       | 0.023             | 0.026  | 1.13       |
| <i>TAC3-KISS1</i> | 0.70                                          | 0.68   | 1.02       | 0.025             | 0.026  | 1.04       |
| <i>GHRH-SST</i>   | 0.70                                          | 0.67   | 1.04       | 0.026             | 0.036  | 1.38       |
| <i>CALCA-PTH</i>  | 0.68                                          | 0.68   | 1.00       | 0.027             | 0.026  | 1.03       |
| <i>INS-GCG</i>    | 0.70                                          | 0.70   | 1.00       | 0.026             | 0.026  | 1.00       |
| <i>CALCA-INS</i>  | 0.68                                          | 0.70   | 1.02       | 0.027             | 0.026  | 1.03       |
| <i>CALCA-GCG</i>  | 0.68                                          | 0.70   | 1.02       | 0.027             | 0.026  | 1.03       |
| <i>PTH-INS</i>    | 0.68                                          | 0.70   | 1.02       | 0.026             | 0.026  | 1.00       |
| <i>PTH-GCG</i>    | 0.68                                          | 0.70   | 1.02       | 0.026             | 0.026  | 1.00       |

**Table S7: Accession numbers of the gene sequences used in the study. All sequences are collected from the Ensembl database except three highlighted sequences which are collected from the NCBI Reference sequence.**

| Species    | <i>GnRH</i>            | <i>GnIH</i>            | <i>TAC3</i>            | <i>PDYN</i>            | <i>GHRH</i>            | <i>SST</i>             | <i>PTH</i>             |
|------------|------------------------|------------------------|------------------------|------------------------|------------------------|------------------------|------------------------|
| Human      | ENSG<br>00000147437    | ENSG<br>00000105954    | ENSG<br>00000166863    | ENSG<br>00000101327    | ENSG<br>00000118702    | ENSG<br>00000157005    | ENSG<br>00000152266    |
| Chimpanzee | ENSPTRG<br>00000020091 | ENSPTRG<br>00000018998 | ENSPTRG<br>00000005117 | ENSPTRG<br>00000013172 | ENSPTRG<br>00000013472 | ENSPTRG<br>00000015727 | ENSPTRG<br>00000003379 |
| Monkey     | ENSMMUG<br>00000029018 | ENSMMUG<br>00000008369 | ENSMMUG<br>00000003203 | ENSMMUG<br>00000009984 | ENSMMUG<br>00000031295 | ENSMMUG<br>00000000850 | ENSMMUG<br>00000007017 |
| Cow        | ENSBTAG<br>00000000164 | ENSBTAG<br>00000019447 | ENSBTAG<br>00000021807 | ENSBTAG<br>00000034258 | ENSBTAG<br>00000012710 | ENSBTAG<br>00000017312 | ENSBTAG<br>00000019080 |
| Elephant   | ENSLAFG<br>00000003526 | ENSLAFG<br>00000008838 | ENSLAFG<br>00000017982 | ENSLAFG<br>00000012785 | ENSLAFG<br>00000016485 | ENSLAFG<br>00000012303 | ENSLAFG<br>00000028790 |
| Horse      | ENSECAG<br>00000010664 | ENSECAG<br>00000021063 | XM_0014884<br>15.2     | ENSECAG<br>00000007241 | ENSECAG<br>00000011318 | ENSECAG<br>00000023368 | ENSECAG<br>00000019608 |
| Dog        | ENSCAFG<br>00000008985 | ENSCAFG<br>00000002863 | ENSCAFG<br>00000000155 | ENSCAFG<br>00000006748 | ENSCAFG<br>00000008743 | ENSCAFG<br>00000013891 | ENSCAFG<br>00000008177 |
| Guinea Pig | ENSCPOG<br>00000015538 | ENSCPOG<br>00000013784 | ENSCPOG<br>00000012924 | ENSCPOG<br>00000024291 | ENSCPOG<br>00000020252 | ENSCPOG<br>00000009662 | ENSCPOG<br>00000003894 |
| Mouse      | ENSMUSG<br>00000015812 | ENSMUSG<br>00000029831 | ENSMUSG<br>00000025400 | ENSMUSG<br>00000027400 | ENSMUSG<br>00000027643 | ENSMUSG<br>00000004366 | ENSMUSG<br>00000059077 |
| Rat        | ENSRNOG<br>00000013441 | ENSRNOG<br>00000010806 | ENSRNOG<br>00000004229 | ENSRNOG<br>00000026036 | ENSRNOG<br>00000007782 | ENSRNOG<br>00000001837 | ENSRNOG<br>00000014318 |
| Opossum    | ENSMODG<br>00000016713 | ENSMODG<br>00000000610 | ENSMODG<br>00000019398 | ENSMODG<br>00000013953 | XM_001381707.1         | ENSMODG<br>00000008503 | ENSMODG<br>00000008738 |

**Table S7 continued.**

| <b>Species</b> | <b>CALCA</b>           | <b>INS</b>               | <b>GCG</b>             |  |  |  |  |
|----------------|------------------------|--------------------------|------------------------|--|--|--|--|
| Human          | ENSG<br>00000110680    | ENSG<br>00000254647      | ENSG<br>00000115263    |  |  |  |  |
| Chimpanzee     | ENSPTRG<br>00000033390 | ENSPTRG<br>00000003172   | ENSPTRG<br>00000012580 |  |  |  |  |
| Monkey         | ENSMMUG<br>00000020245 | ENSMMUG<br>00000031267   | ENSMMUG<br>00000003198 |  |  |  |  |
| Cow            | ENSBTAG<br>00000027735 | ENSBTAG<br>00000013003   | ENSBTAG<br>00000000730 |  |  |  |  |
| Elephant       | ENSLAFG<br>00000003276 | ENSLAFG<br>00000020914   | ENSLAFG<br>00000005647 |  |  |  |  |
| Horse          | ENSECAG<br>00000008818 | ENSECAG<br>00000024609   | ENSECAG<br>00000005660 |  |  |  |  |
| Dog            | ENSCAFG<br>00000008546 | ENSCAFG<br>00000010092   | ENSCAFG<br>00000010414 |  |  |  |  |
| Guinea Pig     | ENSCPOG<br>00000009939 | ENSCPOG<br>00000008198   | ENSCPOG<br>00000024193 |  |  |  |  |
| Mouse          | ENSMUSG<br>00000030666 | ENSMUSG<br>00000035804   | ENSMUSG<br>00000000394 |  |  |  |  |
| Rat            | ENSRNOG<br>00000011074 | ENSRNOG<br>00000012052   | ENSRNOG<br>00000005498 |  |  |  |  |
| Opossum        | ENSMODG<br>00000007251 | <a href="#">P18109.1</a> | ENSMODG<br>00000005566 |  |  |  |  |
